# Supplementary material for: A GWAS in the pandemic epicenter highlights the severe COVID-19 risk locus introgressed by Neanderthals
Source: PubMed Central journal article supplement — iScience. 2023 Aug 16;26(10):107629. doi: 10.1016/j.isci.2023.107629 (PMC10507134; doi:10.1016/j.isci.2023.107629), 2023-08-16
Supplement: mmc4.pdf [file mmc4.pdf]

## ORIGIN ORGANIZATION

### *Coordinator*

**G. Remuzzi, MD.**

### *Project Management*

**M. Noris, PhD; N Rubis RN; M. Breno, PhD; S. Gamba, RN; E. Daina MD; A.**

**Benigni, PhD.**

### *Regulatory Affairs*

**P. Boccardo, BiolSciD; S. Peracchi, J. Piffari.**

### *Informatic Technologies*

**D. Martinetti, Eng; S. Carminati, Eng.**

### *Data Management and Monitoring*

**W. Calini; O. Diadei ChemD; G. Gherardi, RN; S. Orisio PhD; N. Rubis RN; A. Villa BiotechD; D. Villa ResNatD.**

### *Clinical interviews and data collection, and sample collection*

**E. Bresin, MD; D.I. Cadè, RN; A. Cannata, Lab Tech; F. Carrara, BiolSciD; P. Carrara, RN; D. Cugini, BiolSciD; D. Curtò, MD; A.A. Diffidenti, RN; S. Ferrari, Lab Tech; S. Gamba, RN; T. Gamba, MD; S. Gioia, RN; C. Guarinoni, RN; A. Imeraj MD; V. Lecchi, RN; A. Parvanova, MD, PhD, DSc; S. Prandini, RN; M. Rigoldi MD; N. Stucchi, M. Montefusco, Lab Tech.**

### *Genetic Studies*

**M. Alberti, Lab Tech; R. Donadelli, BiolSciD; L. Liguori, BiolSciD; C. Mele, PhD; S. Orisio, PhD; R. Piras, PhD; E. Valoti, PhD.**

*Data Analysis*

**M. Breno, PhD; M. Noris PhD.**

*Communication*

**D. Abbatantuono; L. Generali; B. Greco; G. Masserdotti; E. Lubrina; A. Schieppati**

MD; press: AdnKronos, Alto Adige, Araberara, Avvenire, Bergamonews, Bergamo TV, Corriere della Sera Bergamo, D – La Repubblica, Gente, Il Farmacista Online, Il Giornale, Il Giorno, Il Popolo Cattolico, L'Eco di Bergamo, Panorama della Sanità, Prima Bergamo, Quotidiano Sanità, Rai 3 – Presa Diretta, Rai 3 – Quante Storie, Terra nuova, TG1 Medicina, TGR Leonardo, Vita.it.

*Secretaries*

**L. Arioli; R. Gervasoni; M. Minali; B. Remonti; S. Yakimchuk.**

*Project promotion, questionnaire distribution and collection*

**Administrations:** Bergamo (**G. Gori, Mayor; C. Sanchez, Capo di Gabinetto and the staff of Oggi Come Stai**); Albino (**F. Terzi, Mayor**); **A. Costantini, Director Servizi Sociosanitari Val Seriana** (Albino); Alzano Lombardo (**C. Bertocchi, Mayor**); Aviatico, Casnigo, Cene (**E. Moreni, Mayor**), Cazzano S. Andrea (**S. Spampatti, Mayor**), Clusone, Colzate, Cortenuova, Fiorano al Serio, Gandino, Gazzaniga (**A. Merici, Deputy Mayor**); Ghisalba, Gorle, Leffe, Nembro (**C. Cancelli, Mayor**); Pedrengo, Peia, Pradalunga, Ranica (**M. Vergani, Mayor**); Romano di Lombardia (**S. Nicoli, Mayor**); San Giovanni Bianco, Scanzorosciate, Selvino, Seriate, Torre de Busi, Vertova, Villa di Serio, Zogno.

**Educational Institutes:** **B. Belotti** (Bergamo); **G. Camozzi** (Bergamo); **E. De Amicis** (Bergamo); **E. Donadoni** (Bergamo); **G. Galli** (Bergamo); **Imiberg** (Bergamo); **IPIA C. Pesenti** (Bergamo); **ISIS G Natta** (Bergamo); **ITIS Paleocopa** (Bergamo); **V. Muzio** (Bergamo); **Santa**

**Lucia** (Bergamo); **Scuola Materna Suor M.M.A. Pesenti** (Alzano Lombardo); **E. Talpino** (Nembro).

**Diocese and Priests: Mons. A. Bellini; Mons. F. Beschi; Bishop** (Bergamo); **Mons. G Carzaniga; Don M. Cella; Don D. Bravo Chaplain** (Hospital Pesenti Fenaroli, Alzano L); **Don I. Chiodi, Director** (Oratorio San F Neri, Nembro); **Don G. Merlini, Parish Priest** (Lefte); **Parish Priest** (Alzano Lombardo); **Parish Priest** (Gandino); **Parish Priest** (Gavarno-Nembro); **Parish Priest** (Bergamo); **Don F. Tomaselli; the Priests of Valgandino**

**Medical doctors: ATS** (Bergamo); **M.C. Aparicio; E. Bombana, MD Infectious Disease Specialist** (ASST-Bergamo Est, Bergamo); **F. Carrara Dentist** (Alzano Lombardo); **F. Di Marco, MD Unit of Pulmonary Medicine, F. Locati, MD General Manager; L. Lorini, MD Intensive Care Unit** (ASST Papa Giovanni XXIII, Bergamo), **L. Mosconi MD Family doctor** (Gandino); **R. Munda MD Family doctor** (Nembro); **M. Pandini, MD Family doctor, G.N. Valerio MD Family doctor, B. Pazzano MD Pediatrician** (Nembro); **MD Family doctor** (Cene), **Centro Medico Valseriana** (Vertova).

#### **Pharmacies:**

**Farmacia Agostini** (Fiorano al Serio); **Farmacia Ambrogina** (Gorle); **Farmacia E. Carrara** (Casnigo); **Farmacia Dr. Castelli** (Selvino); **Farmacia Centrale** (Albino); **Farmacia Centrale Pesenti; Farmacia Farmacia dr. Corbelletta** (Torre Boldone); **Farmacia De Gasperis; Farmacia Farma Salute** (Gandino); **Farmacia M. Gallerani** (Villa di Serio); **Farmacia S. Gandossi; Farmacia Giacherio** (Ranica); **Farmacia Le Torrette; Farmacia Mandelli** (Bergamo); **Farmacia Nuova Fortini** (Seriante); **Farmacia Pancheri** (Lefte); **Farmacia F. Pagnoncelli** (Scanzorosciate); **Farmacia Rotelli** (Cene); **Farmacia Rebba** (Nembro); **Farmacia San Rocco** (Vertova); **Farmacia**

**M. Strauch** (Pradalunga); **Farmacia V. Trussardi** (Colzate); **Farmacia Vall'Alta di Albino P. Dragoni**, **Farmacia G. Venturini**; **Farmacia Verzeri**; **Farmacia Villa di Serio**; **Farmacia Villaggio Sposi S. Giassi**; **Farmacia Via Camozzi D. Visigalli** (Bergamo);

**Associations and Foundations: ACLI** (Nembro); **Amici della Biblioteca** (Nembro); **ASD David** (Nembro); **ASD Atletica Saletti** (Nembro); **Associazione Nazionale Alpini Gruppo** (Nembro); **AS Volleymania** (Nembro); **AVIS provinciale** (Bergamo); **Centro Italiano Femminile** (Nembro); **Club Alpino Italiano** (Nembro); **Distretto delle 5 Terre della Val Gandino** (Gandino); **Federfarma** (Bergamo); **Federmanager** (Bergamo); **Fondazione A.R.M.R. Aiuti Per La Ricerca Sulle Malattie Rare** (Bergamo); **Gherim** (Nembro); **Lions Club** (Bergamo); **Paese Vivo** (Nembro); **Peia's Friends** (Peia); **Redazione di Il Nembro** (Nembro); **Rotary Club** (Bergamo); **Progetto Rocco** (Bergamo); **Seriana Basket** (Nembro); **Sindacato CGIL** (Nembro); **Sindacato CISL-FNP** (Nembro).

**Volunteers: A. Barcella**; **T. Bergamelli** (Nembro); **E. Corbani** (Bergamo); **S. Daminelli** (Urgnano); **D. Fornoni** (Nembro); **G. Gherardi**; **I. Lenzi** (Nembro); **I giovani dell'Oratorio** (Nembro); **C. Maffioletti** (Pedrengo); **D. Melacini and the researchers of Centro Anna Maria Astori Science and Technology Park Kilometro Rosso**(Bergamo); **M. Morigi**; **S. Morotti** (Nembro); **A. Noris** (Nembro); **M. Passera**; **L. Perico**, **A. Pezzotta**, **A. Piccinelli**, **A. Russino** (Nembro); **P. Pulieri and the researchers of Clinical Research Center for Rare Diseases Aldo e Cele Daccò**, Ranica, Bergamo; **F. Perani** (Casnigo); **M. Perego** (Urgnano); **N. Persico and Church service volunteers** (Nembro); **The shopkeepers** (Nembro); **V. Trovesi** (Library, Nembro); and many others.
